# Supplementary material for: The Complete Mitochondrial Genome of Aleurocanthus camelliae: Insights into Gene Arrangement and Genome Organization within the Family Aleyrodidae
Source: Int J Mol Sci. 2016 Nov 7;17(11):1843. doi: 10.3390/ijms17111843 (PMC5133843; doi:10.3390/ijms17111843)
Supplement: Supplementary file 1 [file ijms-17-01843-s001.xlsx]

## Sheet: Sheet1
Table S1. Reannotation of mitochondrial genomes of Aleurodicus dugesii, Neomaskellia andropogonis and Tetraleurodes acaciae
Aleurodicus Dugesii									Neomaskellia Andropogonis									Tetraleurodes Acaciae
Original a				Modified b					Original				Modified					Original				Modified
Gene	Region	Size	INC	Gene	Region	Size	INC		Gene	Region	Size	INC	Gene	Region	Size	INC		Gene	Region	Size	INC	Gene	Region	Size	INC
cox1	1-1548	1548	1	cox1	1-1548	1548	1		cox1	1-1539	1539	0	cox1	1-1539	1539	0		cox1	1-1539	1539	0	cox1	1-1539	1539	0
trnL2	1549-1613	65	0	trnL2	1549-1613	65	0		trnL2	1541-1603	63	1	trnL2	1541-1603	63	1		trnL2	1540-1605	66	0	trnL2	1540-1605	66	0
cox2	1614-2274	661	0	cox2	1614-2274	661	0		cox2	1604-2320	717	0	cox2	1604-2264	661	0		cox2	1606-2270	665	0	cox2	1606-2270	665	0
trnK	2275-2344	70	0	trnK	2275-2344	70	0						trnK	2265-2330	66	0		trnK	2271-2341	71	0	trnK	2271-2341	71	0
trnD	2347-2408	62	2	trnD	2347-2408	62	2		trnD	2338-2403	66	17	trnD	2338-2403	66	7		atp8	2337-2480	144	-5	atp8	2337-2480	144	-5
atp8	2409-2555	147	0	atp8	2409-2555	147	0		atp8	2413-2559	147	9	atp8	2413-2559	147	9		atp6	2544-3194	651	63	atp6	2544-3194	651	63
atp6	2552-3202	651	-4	atp6	2552-3202	651	-4		atp6	2553-3185	633	-9	atp6	2553-3185	633	-9		trnE	3213-3275	63	18	trnE	3213-3275	63	18
cox3	3206-3985	780	3	cox3	3206-3985	780	3		trnS1	3215-3268	54	29	trnS1	3215-3268	54	29		trnF	3278-3344	67	2	trnF	3278-3344	67	2
trnG	3994-4064	71	8	trnG	3994-4064	71	8		trnE	3269-3331	63	0	trnE	3269-3331	63	0		nad5	3345-4998	1654	0	nad5	3345-4998	1654	0
nad3	4054-4413	360	-11	nad3	4054-4413	360	-11		trnF	3320-3385	66	-12	trnF	3320-3385	66	-12		trnH	4999-5059	61	0	trnH	4999-5059	61	0
trnA	4419-4479	61	5	trnA	4419-4479	61	5		nad5	3385-5010	1626	-1	nad5	3385-5010	1626	-1		nad4	5060-6344	1285	0	nad4	5060-6344	1285	0
trnR	4478-4541	64	-2	trnR	4478-4541	64	-2		trnH	5012-5074	63	1	trnH	5012-5074	63	1		nad4L	6338-6637	300	-5	nad4L	6338-6637	300	-5
trnN	4541-4609	69	-1	trnN	4541-4609	69	-1		nad4	5082-6359	1278	7	nad4	5082-6359	1278	7		trnT	6639-6705	66	1	trnT	6639-6705	66	1
				trnS1	4608-4662	55	-2		nad4L	6353-6643	291	-7	nad4L	6353-6643	291	-7		trnP	6704-6767	64	-2	trnP	6704-6767	64	-2
trnE	4664-4728	65	54	trnE	4664-4728	65	1		trnT	6655-6716	62	11	trnT	6655-6716	62	11		nad6	6808-7236	429	40	nad6	6808-7236	429	40
trnF	4719-4782	64	-10	trnF	4719-4782	64	-10		nad6	6788-7219	432	71	nad6	6788-7219	432	71		cob	7236-8372	1137	-1	cob	7236-8372	1137	-1
nad5	4782-6455	1674	-1	nad5	4782-6455	1674	-1		cob	7242-8363	1122	22	cob	7242-8363	1122	22		trnS2	8371-8425	55	-2	trnS2	8371-8425	55	-2
trnH	6453-6515	63	-3	trnH	6453-6515	63	-3		trnK	8364-8424	61	0	trnS2	8367-8421	55	3		nad1	8426-9352	927	0	nad1	8426-9352	927	0
nad4	6516-7790	1275	0	nad4	6516-7790	1275	0		nad1	8421-9347	927	-4	nad1	8421-9347	927	-1		trnL1	9359-9424	66	6	trnL1	9359-9424	66	6
nad4L	7784-8083	300	-7	nad4L	7784-8083	300	-7		trnL1	9345-9412	68	-3	trnL1	9345-9412	68	-3		rrnL	9428-10624	1197	3	rrnL	9428-10624	1197	3
trnT	8082-8150	69	-2	trnT	8082-8150	69	-2		rrnL	9417-10584	1168	4	rrnL	9417-10584	1168	4		rrnS	10678-11412	735	53	rrnS	10678-11412	735	53
trnP	8149-8213	65	-2	trnP	8149-8213	65	-2		trnP	10554-10618	65	-31	trnP	10554-10618	65	-31		trnQ	11426-11490	65	13	trnQ	11426-11490	65	13
nad6	8257-8673	417	43	nad6	8257-8673	417	43		nad3	10628-10981	354	9	nad3	10628-10981	354	9		trnV	11495-11558	64	4	trnV	11495-11558	64	4
cob	8679-9809	1131	5	cob	8679-9809	1131	5		trnG	10982-11044	63	0	trnG	10982-11044	63	0						trnN	11557-11621	65	-2
trnS2	9800-9852	53	-10	trnS2	9800-9852	53	-10		cox3	11045-11826	782	0	cox3	11045-11826	782	0		nad3	11623-11976	354	64	nad3	11623-11976	354	1
nad1	9839-10795	957	-14	nad1	9839-10795	957	-14		CR	11827-12252	426	0	CR	11827-12252	426	0		trnG	11978-12042	65	1	trnG	11978-12042	65	1
trnL2	10793-10858	66	-3	trnL2	10793-10858	66	-3		trnC	12253-12315	63	0	trnC	12253-12315	63	0		cox3	12043-12825	783	0	cox3	12043-12825	783	0
rrnL	10877-12064	1188	18	rrnL	10877-12064	1188	18		trnY	12335-12397	53	19	trnY	12335-12397	53	19		trnR	12848-12913	66	22	trnR	12848-12913	66	22
trnV	12065-12128	64	0	trnV	12065-12128	64	0		rrnS	12400-13147	748	2	rrnS	12400-13147	748	2		trnD	12914-12981	68	0	trnD	12914-12981	68	0
rrnS	12126-12855	730	-3	rrnS	12126-12855	730	-3		trnV	13146-13210	65	-2	trnV	13146-13210	65	-2		CR	12982-13714	733	0	CR	12982-13714	733	0
				trnQ	12855-12920	66	-1		trnQ	13271-13335	65	60	trnQ	13271-13335	65	60		trnA	13715-13786	72	0	trnA	13715-13786	72	0
CR	12856-14431	1576	0	CR	12921-14431	1511	0						trnI	13340-13401	62	4					0	trnI	13787-13851	65	0
trnI	14432-14498	67	0	trnI	14432-14498	67	0		trnM	13399-13462	64	63	trnM	13399-13462	64	-3		trnM	13848-13915	68	61	trnM	13848-13915	68	-4
trnM	14495-14560	66	-4	trnM	14495-14560	66	-4		nad2	13484-14426	943	21	nad2	13484-14426	943	21		nad2	13916-14890	975	0	nad2	13916-14890	975	0
nad2	14579-15535	957	-2	nad2	14579-15535	957	-2		trnS2	14428-14493	66	1	-					trnW	14889-14952	64	-2	trnW	14889-14952	64	-2
trnW	15534-15597	64	-2	trnW	15534-15597	64	-2		trnW	14430-14493	64	-64	trnW	14430-14493	64	3		trnY	14951-15015	65	-2	trnY	14951-15015	65	-2
trnY	15596-15662	67	-2	trnY	15596-15662	67	-2											trnC	15016-15080	65	0	trnC	15016-15080	65	0
trnC	15663-15722	60	0	trnC	15663-15722	60	0
a original annotations on GenBank.
b Re-annotations in this study and the changes of gene size and position are indicated by red font.
